# Supplementary material for: Electrospun ZIF-derived cavity porous carbon nanofibers as a freestanding cathode for lithium–oxygen batteries with ultralow overpotential
Source: Royal Society of Chemistry journal article supplement (doi:10.1039/d1nr04850c), 2021-01-01
Supplement: d1nr04850c1.pdf [file d1nr04850c1.pdf]

## Supporting Information

### **Electrospun ZIF Derived cavity porous carbon nanofibers as freestanding cathode for lithium-oxygen batteries with ultralow overpotential**

*School of Energy and Environmental Engineering, University of Science and Technology Beijing, Beijing 100083, China; Beijing Key Laboratory of Resource-oriented Treatment of Industrial pollutants, Beijing 100083, China*

Corresponding author: [congjuli@126.com](mailto:congjuli@126.com)

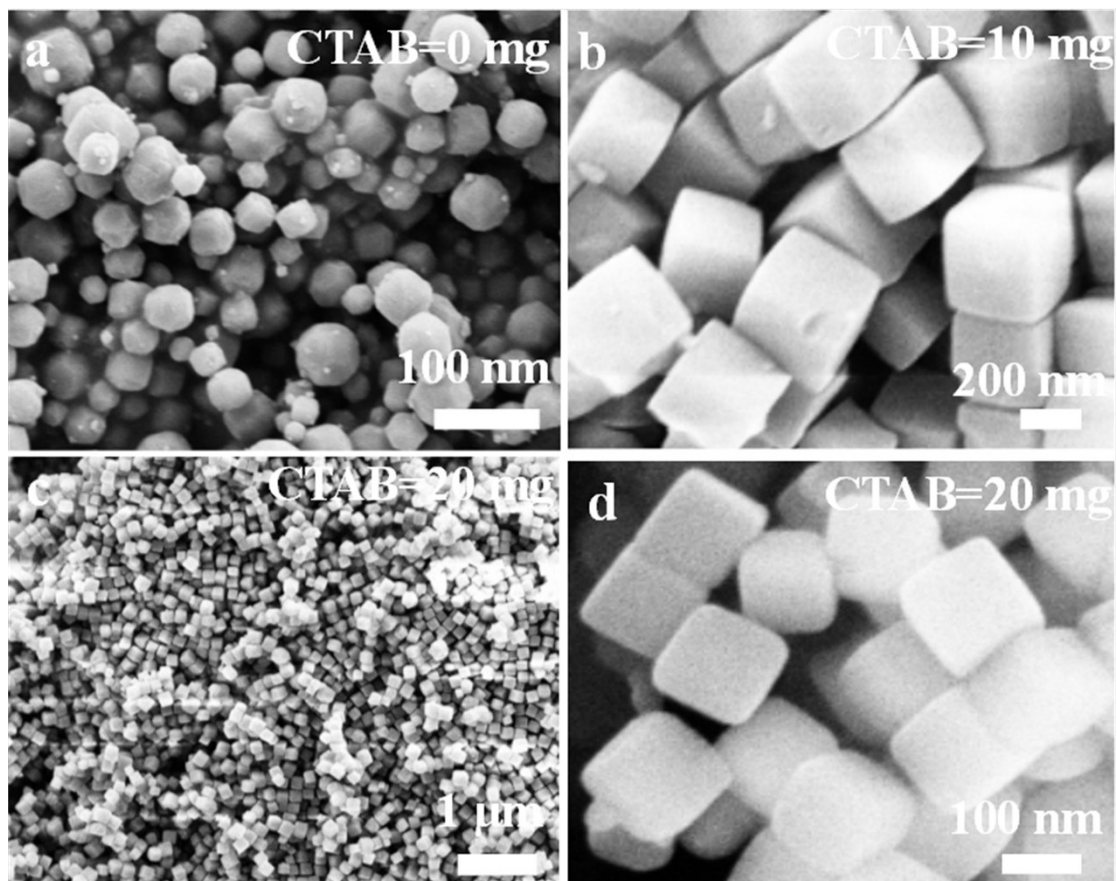

**Fig. S1.** SEM images of (a, b) pure ZIF-8 and cubic ZIF-8 prepared with CTAB contents of 0, 10 mg and (c-d) pure cubic ZIF-8 prepared with CTAB contents of 20 mg at different magnifications.

The average sizes are determined as 380 and 150 nm for the cubic ZIF-8 when the added CTAB amounts are 10 and 20 mg, respectively. The more CTAB added, the faster the nucleation speed and the smaller the size.

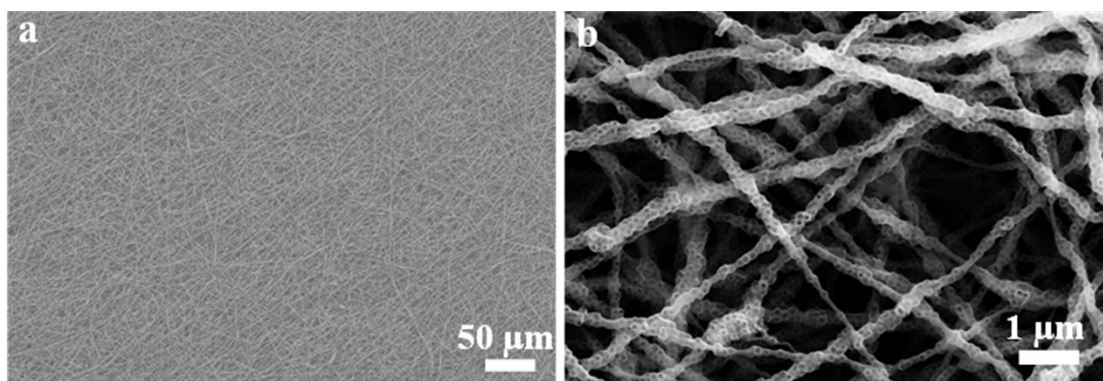

**Fig. S2.** FE-SEM images of Zn/CoNC@CPCFs, respectively (different magnification).

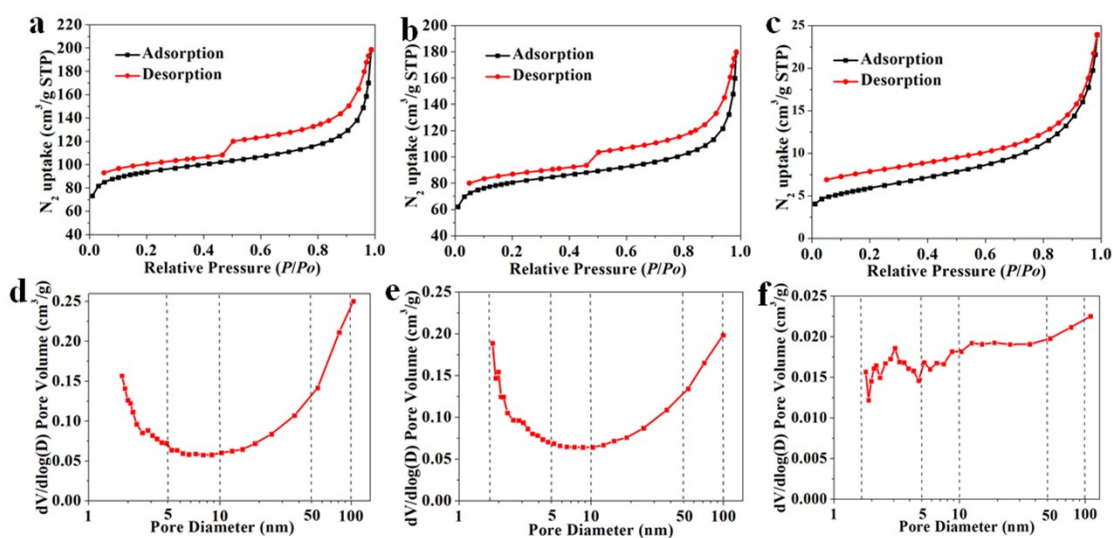

**Fig. S3.** Nitrogen adsorption isotherms and pore size distribution curves of Zn/CoNC@CPCFs (a, d), ZnNC@CPCFs (b, e) and CoNC@CFs (c, f).

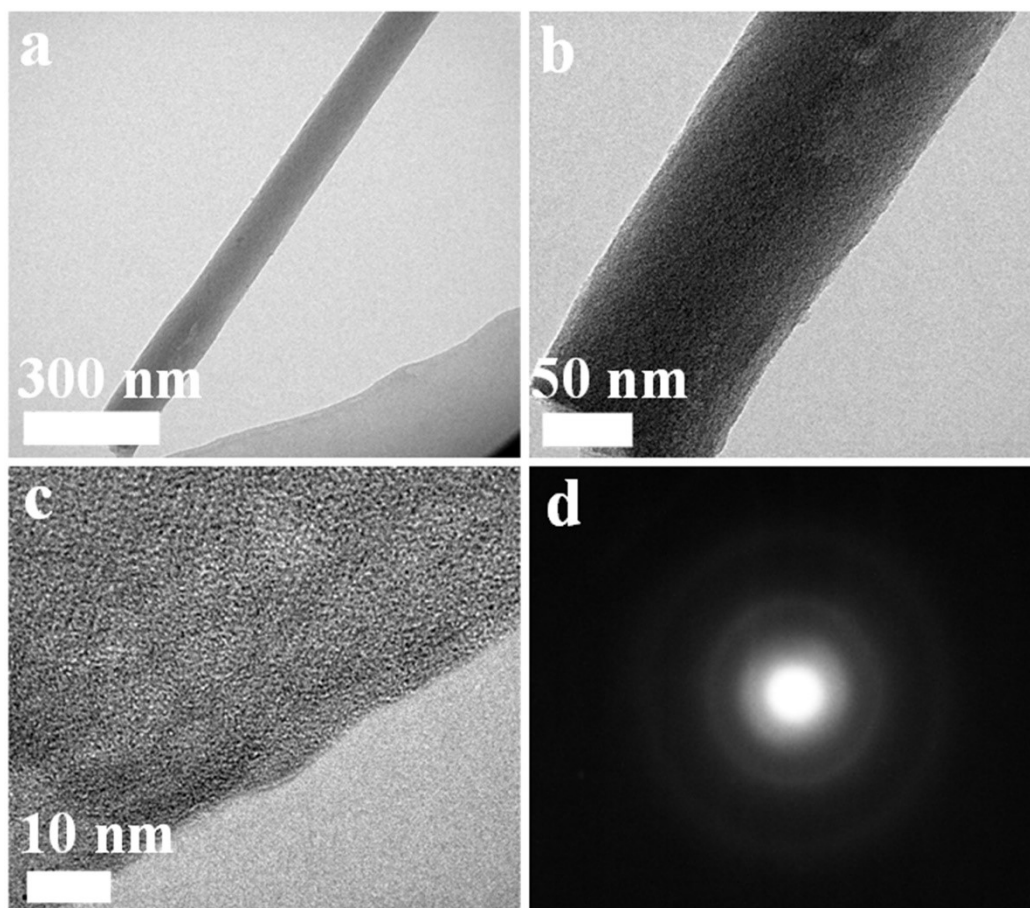

**Fig. S4.** TEM image (a-c) and HRTEM image (d, inset of corresponding SAED pattern) of CoNC@CFs.

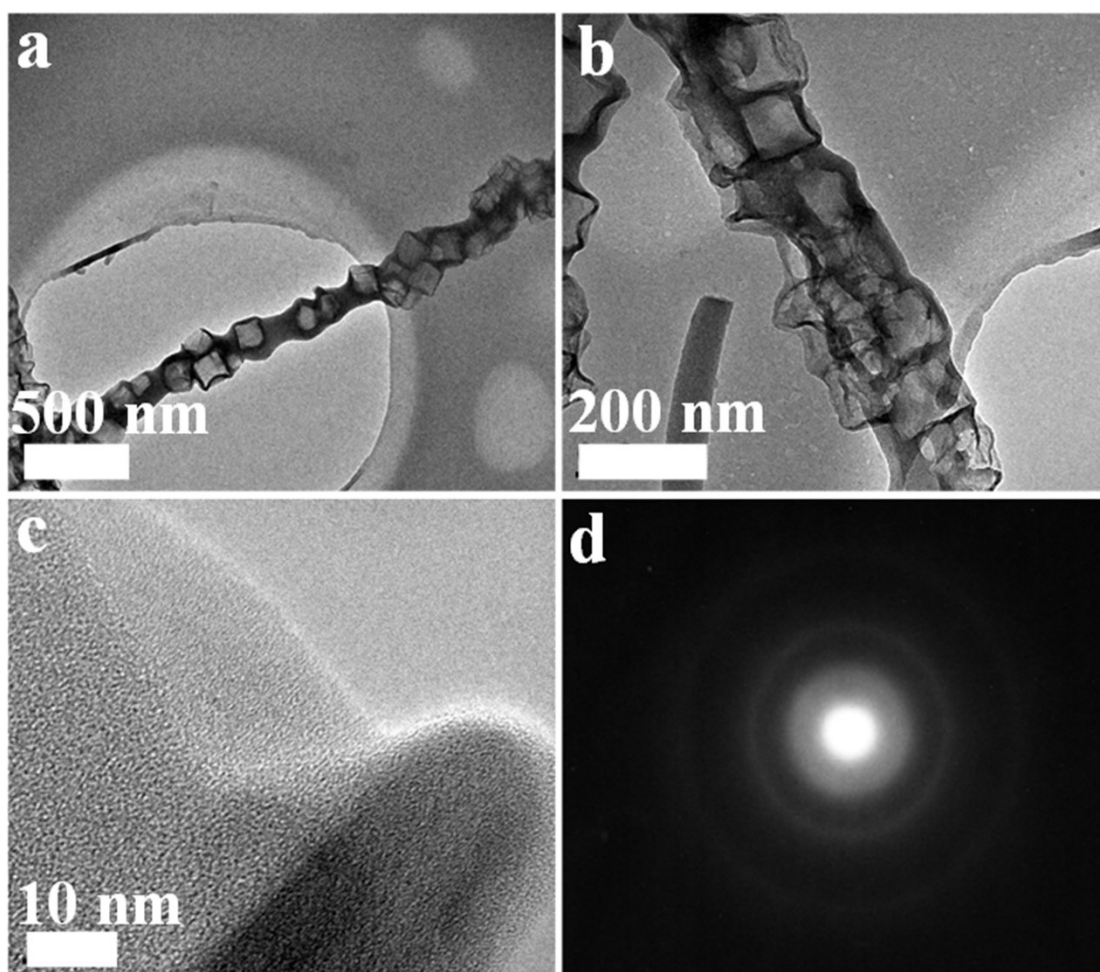

**Fig. S5.** TEM image (a-c) and HRTEM image (d, inset of corresponding SAED pattern) of ZnNC@CPCFs.

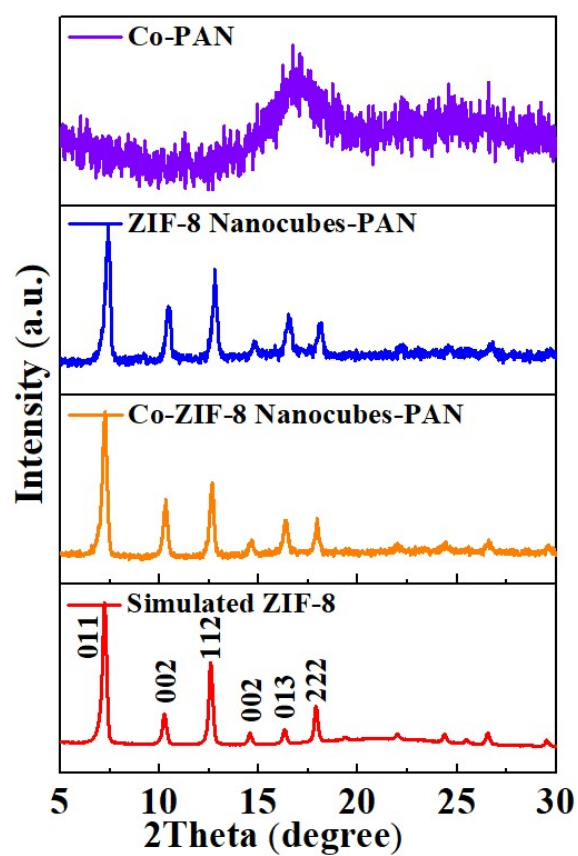

Fig. S6. XRD patterns of as-prepared three samples.

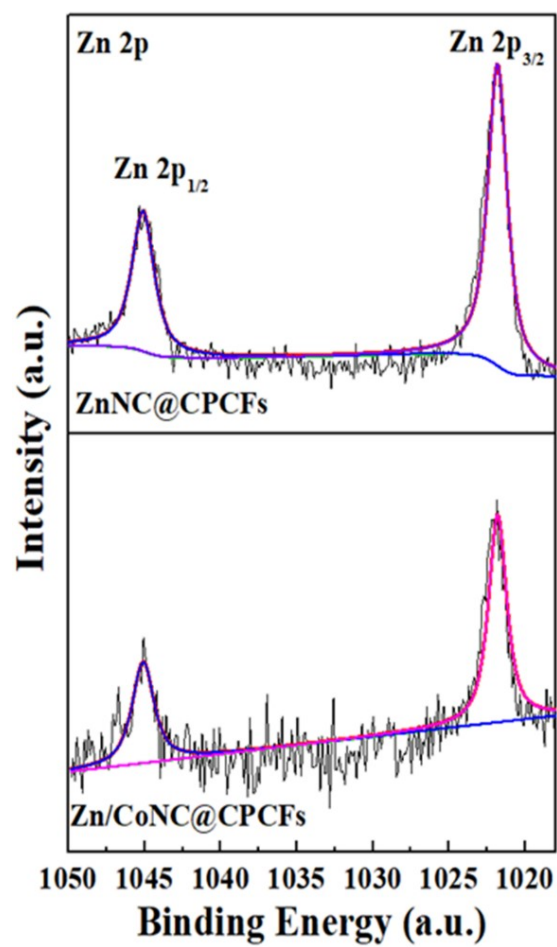

**Fig. S7.** The X-ray photoelectron spectroscopy (XPS) measurement.

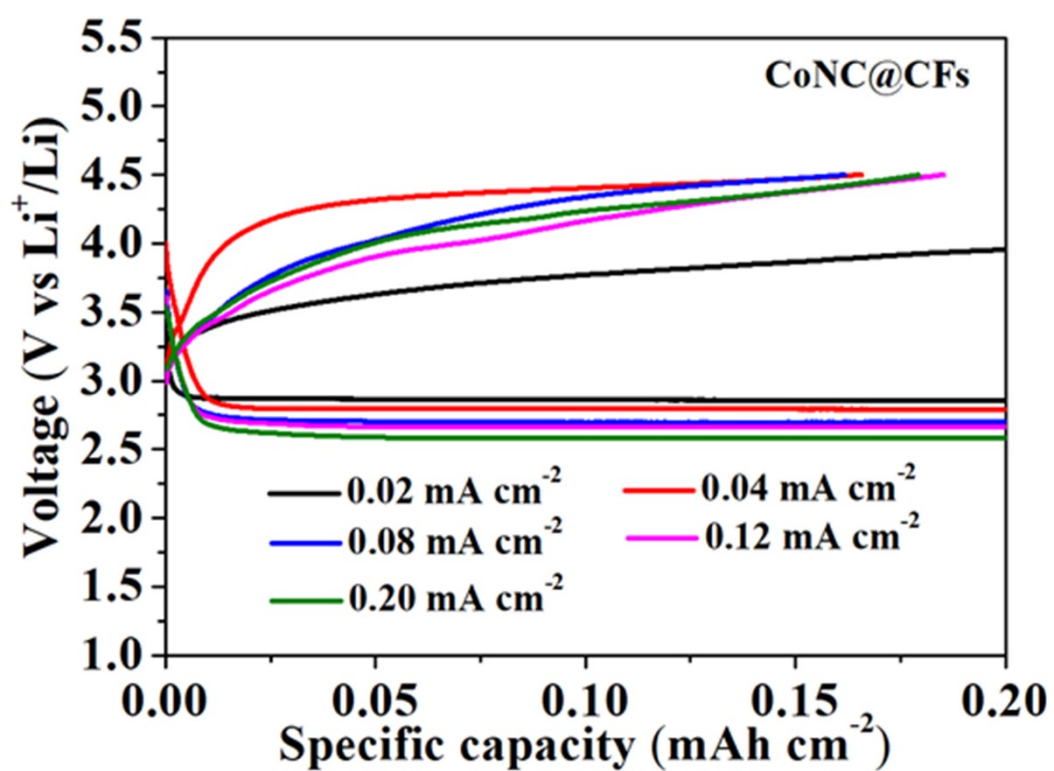

**Fig. S8.** Discharge–charge voltage curves of CoNC@CFs electrodes at different current densities with a cut-off capacity of 0.20 mAh cm<sup>-2</sup>.



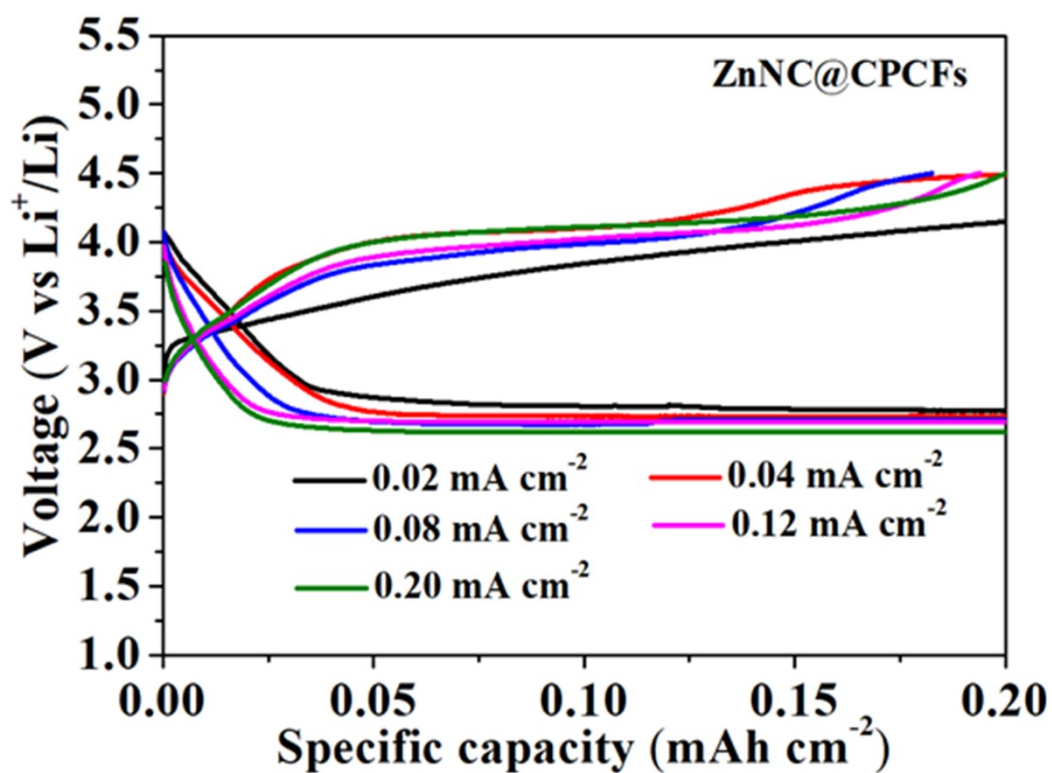

**Fig. S9.** Discharge-charge voltage curves of ZnNC@CPCNFs electrodes at different current densities with a cut-off capacity of 0.20 mAh cm<sup>-2</sup>.

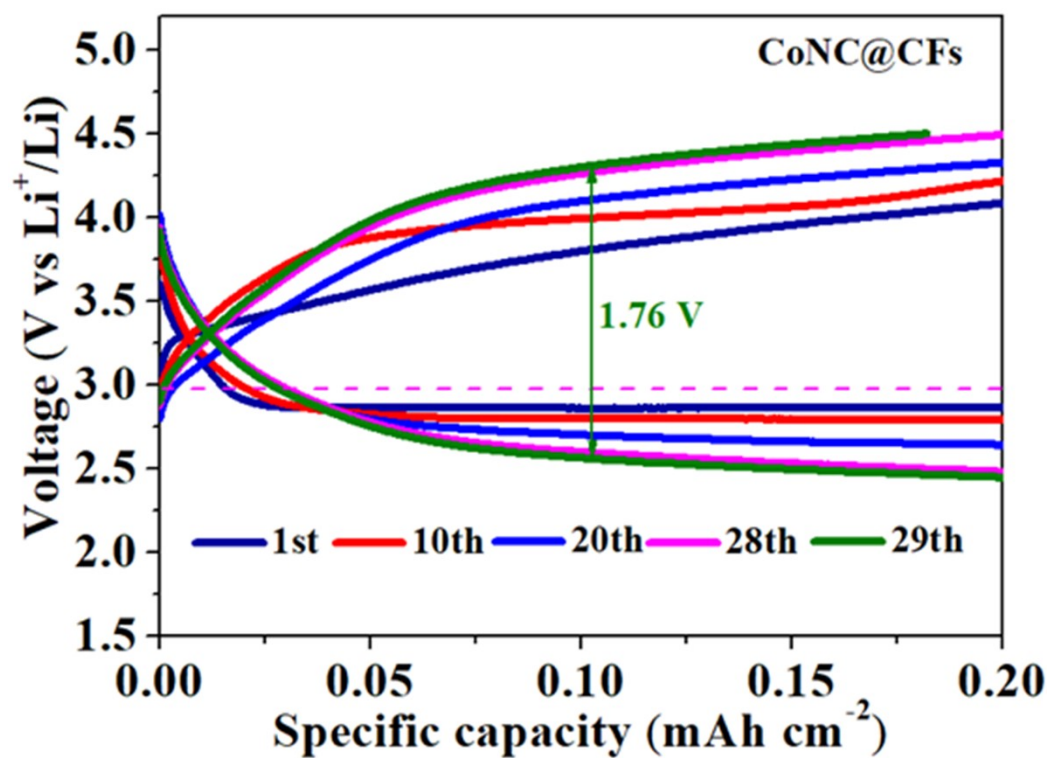

**Fig. S10.** Cycle performance of CoNC@CNFs electrodes at a current density of  $0.02 \text{ mA cm}^{-2}$ .

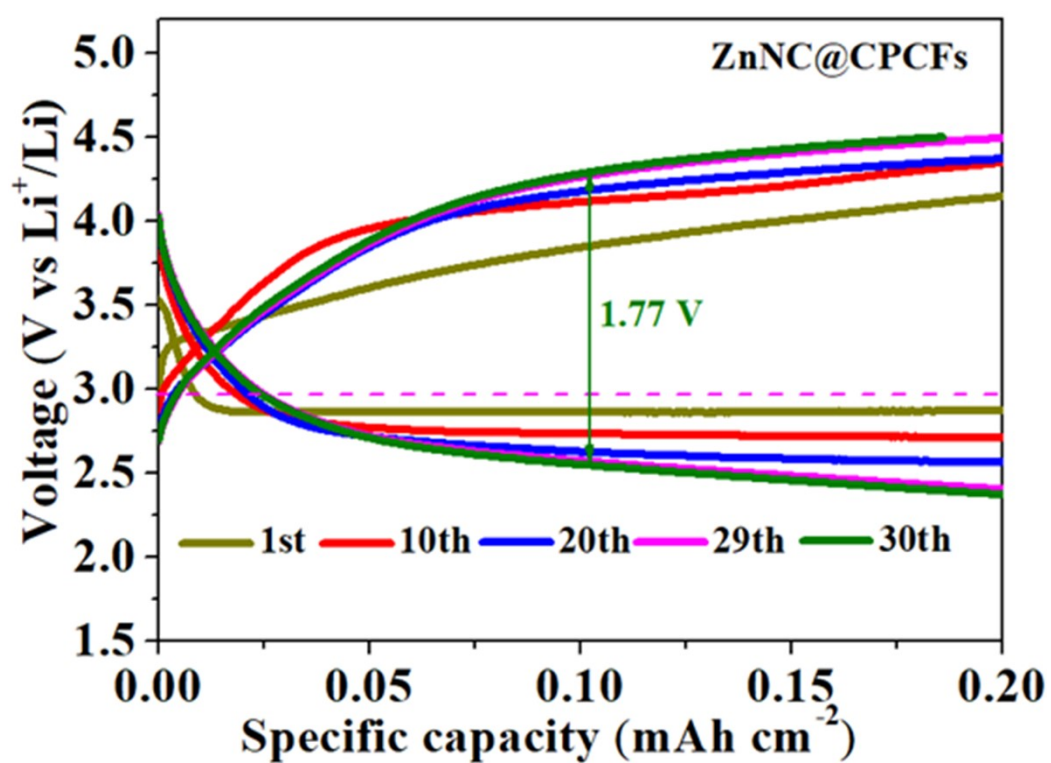

**Fig. S11.** Cycle performance of ZnNC@CPCNFs electrodes at a current density of 0.02 mA cm<sup>-2</sup>.

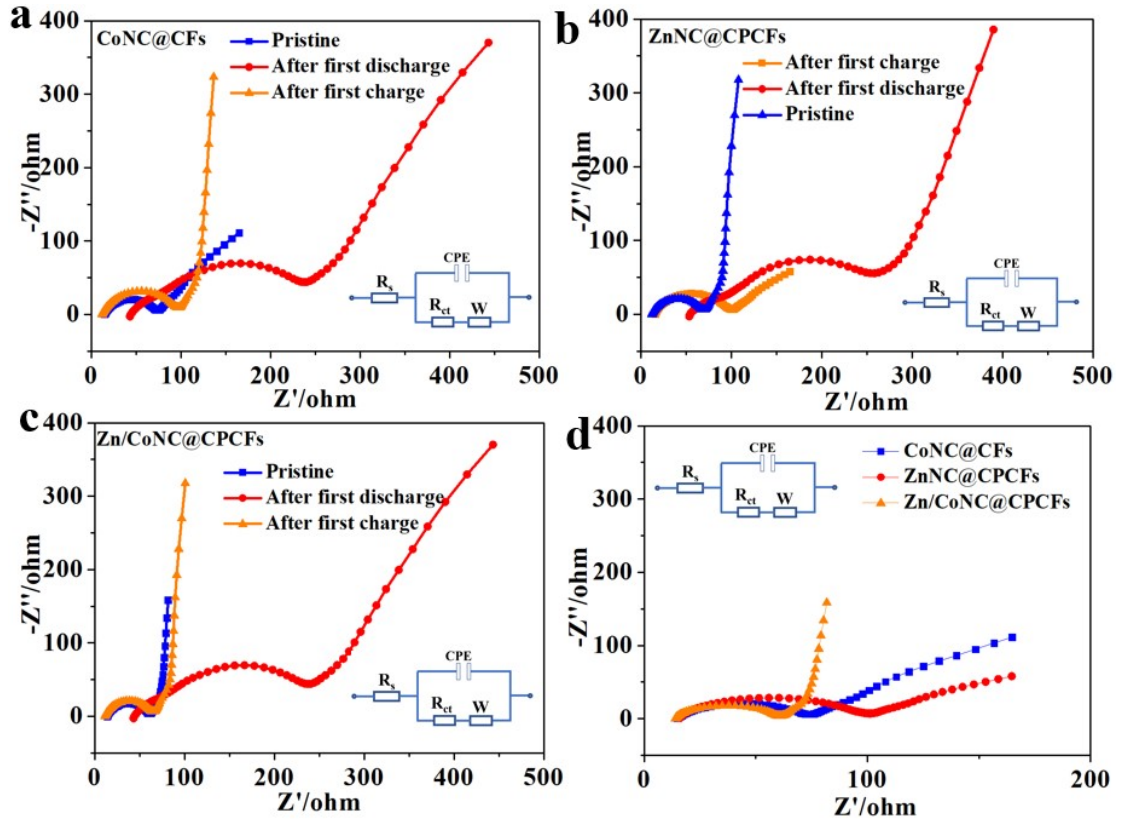

**Fig. S12.** Nyquist plots of Li-O<sub>2</sub> cells with different fabricated air-cathodes under different cycling conditions of original state, discharge to 6 mAh cm<sup>-2</sup>, and charge to 6 mAh cm<sup>-2</sup> (a-c); comparison of the Nyquist plots of three kinds air-cathodes of Li-O<sub>2</sub> cells in the original state (d).

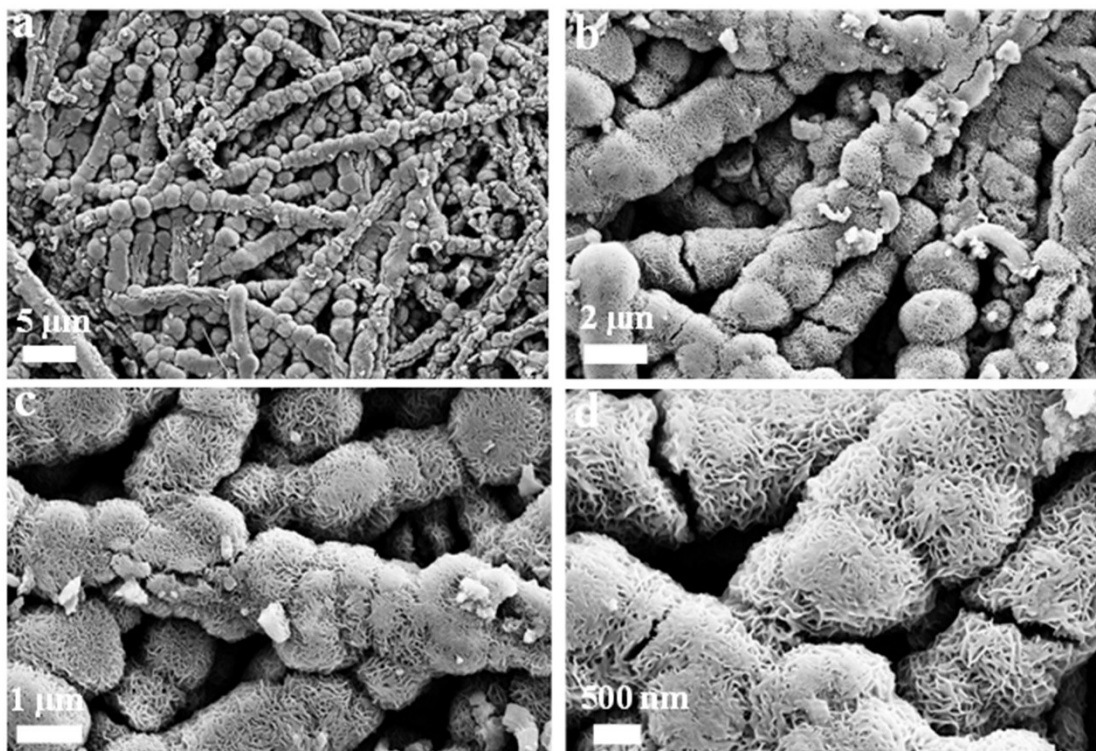

**Fig. S13.** (a–d) the corresponding SEM images of Zn/CoNC@CPCNFs electrode at a discharge capacity of 6 mAh cm<sup>-2</sup>.

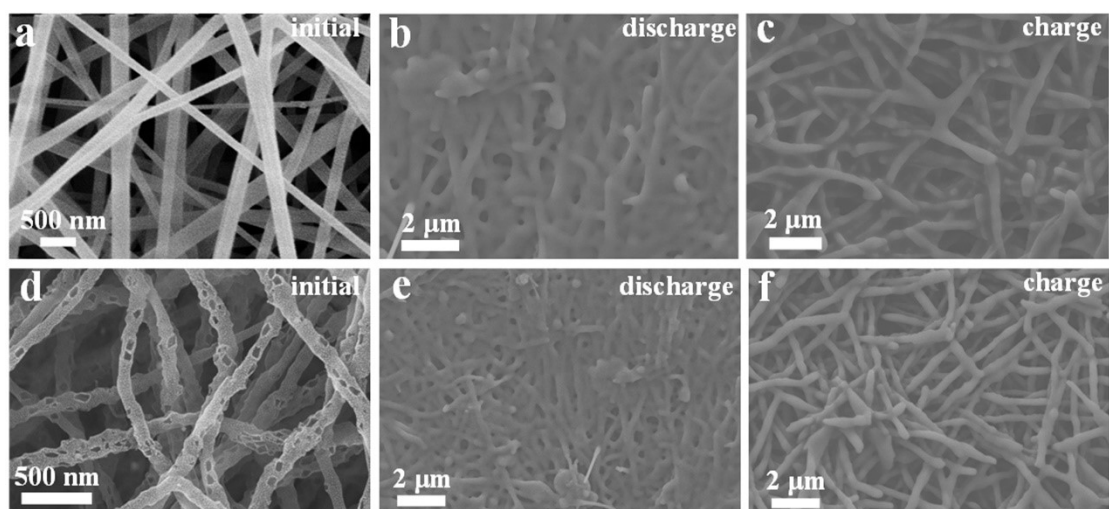

**Fig. S14.** (a–c) the corresponding SEM images of CoNC@CNFs electrode at different discharge and charge states; (d–f) the corresponding SEM images of ZnNC@CPCNFs electrode at different discharge and charge states.

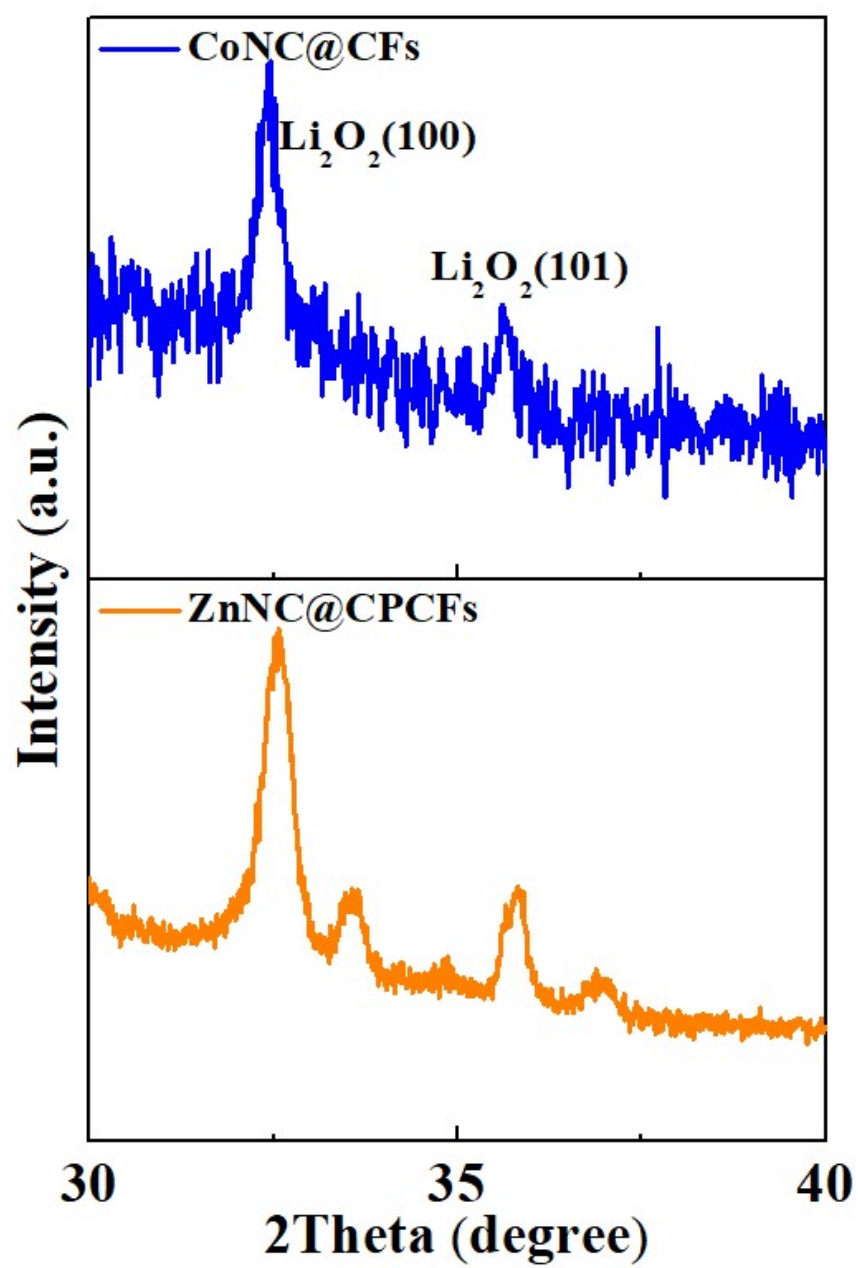

**Fig. S15.** XRD patterns of ZnNC@CPCFs and CoNC@CFs electrodes upon recharge.

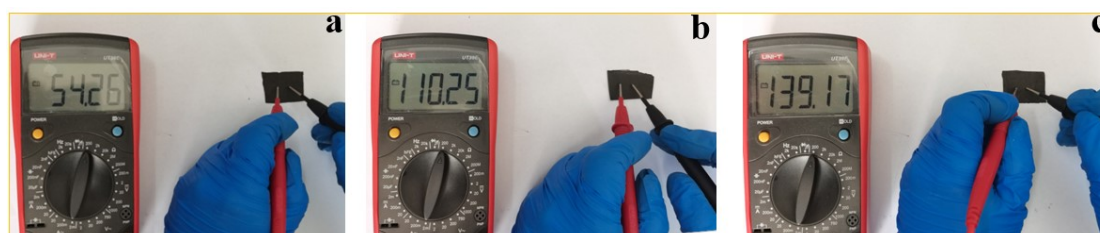

**Fig. S16.** the value of conductivity of fabricated three electrode. (a) Zn/CoNC@CPCFs; (b) ZnNC@CPCFs; (c) CoNC@CFs.

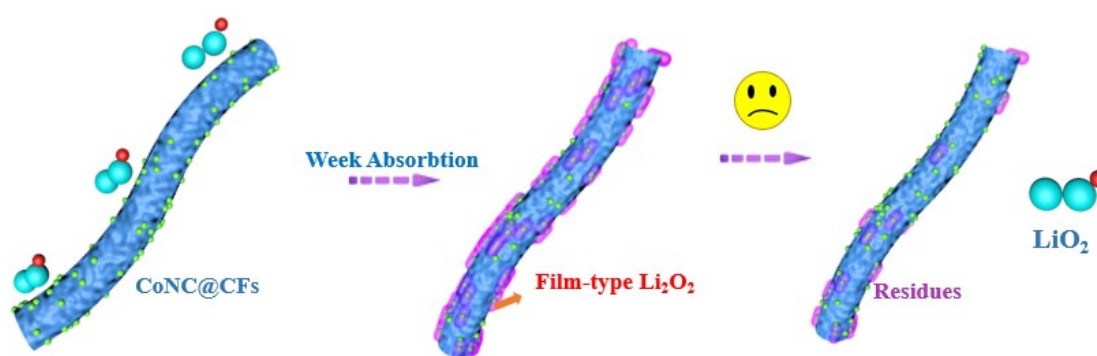

**Fig. S17.** Schematic diagram of the working mechanism of CoNC@CFs electrodes.

**Table S1.** The information of BET surface area, total pore volume, pore width of as-prepared three samples.

| Samples       | $S_{\text{BET}}$<br>( $\text{m}^2/\text{g}$ ) | $V_{\text{total}}$<br>( $\text{cm}^3/\text{g}$ ) | $V_{\text{micro}}$<br>( $\text{cm}^3/\text{g}$ ) | Pore width<br>(nm) | Pore size<br>(nm) |
|---------------|-----------------------------------------------|--------------------------------------------------|--------------------------------------------------|--------------------|-------------------|
| Zn/CoNC@CPCFs | 321.78                                        | 0.307                                            | 0.100                                            | 3.825              | ~2.0, 100         |
| CoNC@CFs      | 20.90                                         | 0.037                                            | 0.003                                            | 7.088              | ~2.0, 100         |
| ZnNC@CPCFs    | 276.85                                        | 0.278                                            | 0.084                                            | 4.022              | ~2.0, 100         |

**Table S2.** The surface atom percentage of Zn/CoNC@CPCFs, ZnNC@CPCFs and CoNC@CFs.

| Samples       | Percentage of different elements (%) |      |       |      |       |
|---------------|--------------------------------------|------|-------|------|-------|
|               | C                                    | Zn   | Co    | N    | O     |
| Zn/CoNC@CPCFs | 69.67                                | 3.55 | 1.65  | 8.00 | 17.43 |
| CoNC@CFs      | 69.93                                |      | 10.68 | 6.81 | 12.58 |
| ZnNC@CPCFs    | 77.58                                | 8.99 |       | 7.09 | 6.35  |

**Table S3.** ICP-OES results of Zn/CoNC@CPCFs catalysts.

| Catalyst      | Co (wt%) |
|---------------|----------|
| Zn/CoNC@CPCFs | 1.80     |



**Table S4.** The terminal value discharge/charge voltage difference.

| Catalyst      | terminal value discharge/charge voltage difference (V) |                          |                          |                          |
|---------------|--------------------------------------------------------|--------------------------|--------------------------|--------------------------|
|               | 0.02 mA cm <sup>-2</sup>                               | 0.04 mA cm <sup>-2</sup> | 0.08 mA cm <sup>-2</sup> | 0.12 mA cm <sup>-2</sup> |
| Zn/CoNC@CPCFs | 0.36                                                   | 0.78                     | 0.99                     | 1.16                     |
| ZnNC@CPCFs    | 1.49                                                   | 1.73                     | 1.80                     | 1.88                     |
| CoNC@CFs      | 1.40                                                   | 1.73                     | 1.84                     | 1.92                     |

**Table S5.** The detailed values of  $R_{ct}$  and  $R_s$  of the EIS equivalent circuit.

| Catalyst      | Pristine              |                    | After first discharge |                    | After first charge    |                    |
|---------------|-----------------------|--------------------|-----------------------|--------------------|-----------------------|--------------------|
|               | $R_{ct}$ ( $\Omega$ ) | $R_s$ ( $\Omega$ ) | $R_{ct}$ ( $\Omega$ ) | $R_s$ ( $\Omega$ ) | $R_{ct}$ ( $\Omega$ ) | $R_s$ ( $\Omega$ ) |
| Zn/CoNC@CPCFs | 49.4                  | 12.8               | 195.7                 | 43.6               | 51.8                  | 13.4               |
| ZnNC@CPCFs    | 86.2                  | 15.8               | 210.2                 | 53.2               | 85.0                  | 16.5               |
| CoNC@CFs      | 60.3                  | 14.6               | 195.7                 | 43.6               | 83.8                  | 14.0               |

**Table S6.** Comparison of various catalysts in their half-recharge overpotential and discharge capacity.

| Catalyst                      | Half-recharge Overpotential | Specific capacity                                          | Current density (mA cm <sup>-2</sup> ) | Ref       |
|-------------------------------|-----------------------------|------------------------------------------------------------|----------------------------------------|-----------|
| Zn/CoNC@CPCFs                 | 0.59 V                      | 12451 mAh g <sup>-1</sup><br>(12.12 mAh cm <sup>-2</sup> ) | 0.02                                   | This work |
| Ru <sub>0.3</sub> SAs-NC      | 1.21 V                      | 13424 mAh g <sup>-1</sup>                                  | 0.02                                   | [1]       |
| CMPACs-Fe                     |                             | 7800 mAh g <sup>-1</sup>                                   | 0.02                                   | [2]       |
| C <sub>p</sub>                | 1.44 V                      | 20300 mAh g <sup>-1</sup>                                  | 0.02                                   | [3]       |
| Ru/ITO                        | 0.67 V                      | 2.5 mAh cm <sup>-2</sup>                                   | 0.025                                  | [4]       |
| Ag/ $\beta$ -MnO <sub>2</sub> | 0.96 V                      | 811 mAh g <sup>-1</sup>                                    | 0.02                                   | [5]       |
| CA                            | 0.78 V                      | 500 mAh g <sup>-1</sup>                                    | 0.02                                   | [6]       |

## Reference

- [1] Hu X, Luo G, Zhao Q, et al. Ru single atoms on N-doped carbon by spatial confinement and ionic substitution strategies for high-performance Li–O<sub>2</sub> batteries. *J Am Chem Soc.*, 2020, 142, 16776–16786.
- [2] Li D, Wang Q, Yao Y, et al. New Application of Waste Citrus Maxima Peel-Derived Carbon as an Oxygen Electrode Material for Lithium Oxygen Batteries. *ACS Appl Mater Interfaces*, 2018, 10, 32058–32066.
- [3] Zhao T, Yao Y, Yuan Y, et al. A universal method to fabricating porous carbon for Li-O<sub>2</sub> battery. *Nano Energy*, 2021, 82, 105782.
- [4] Li F, Tang DM, Chen Y, et al. Ru/ITO: A carbon-free cathode for nonaqueous Li-O<sub>2</sub> battery. *Nano Lett.*, 2013, 13, 4702–4707.
- [5] Huang Z, Zhang M, Cheng J, et al. Silver decorated beta-manganese oxide nanorods as an effective cathode electrocatalyst for rechargeable lithium-oxygen battery. *J Alloys Compd.*, 2015, 626, 173–179.
- [6] Li S, Wang M, Yao Y, et al. Effect of the Activation Process on the Microstructure and Electrochemical Properties of N-Doped Carbon Cathodes in Li-O<sub>2</sub> Batteries. *ACS Appl Mater Interfaces*, 2019, 11, 34997–35004.
